# 1 **Conjugative transfer of naturally occurring plasmids in *Mycolicibacterium* sp.**

2

3 Sergio Morgado\* and Ana Carolina Vicente

4 Laboratory of Molecular Genetics of Microorganisms, Institute Oswaldo Cruz, Rio de Janeiro, Brazil

5 Correspondence:

6 Address: Av Brasil 4365 - Manguinhos, Rio de Janeiro, RJ, 21040-900

7 Telephone: +552138658168

8 Email: [sergio.morgado@ioc.fiocruz.br](mailto:sergio.morgado@ioc.fiocruz.br)

9 Keywords: Conjugation, *Mycobacteriaceae*, *Mycobacterium*, HGT, non-mobilizable

10

## 11 **Abstract**

12 Conjugation is considered the main horizontal gene transfer (HGT) mechanism in  
13 bacterial adaptation and evolution. In the *Mycobacteriaceae* family,  
14 *Mycolicibacterium smegmatis* has been used as the model organism for the  
15 conjugative transfer of hybrid plasmids. However, the natural conjugation process in  
16 any bacteria would involve the transfer of naturally occurring plasmids. Currently,  
17 there is a gap in this regard in relation to this abundant environmental genus of  
18 *Mycobacteriaceae*. Here, we performed conjugation experiments between wild  
19 *Mycolicibacterium* sp. strains involving naturally occurring plasmids (sizes of 21 and  
20 274 kb), and interestingly, evidence of conjugative transfer was obtained. Thus, it is  
21 likely that conjugation occurs in *Mycolicibacterium* in the natural environment,  
22 representing a source of diversification and evolution in this genus of bacteria.

23

## 24 **Introduction**

25 Horizontal gene transfer is fundamental in bacterial adaptation and evolution,  
26 occurring through three natural processes: conjugation, transduction, and  
27 transformation. Among them, conjugation occurs through direct cell-cell contact, and  
28 it is the main mechanism that contributes to the plasmid dispersion, as it occurs  
29 between several bacterial phyla (being mainly studied in *Proteobacteria*) (Wang et al.,  
30 2003; Kohler et al., 2019). In the *Mycobacteriaceae* family, which includes the  
31 *Mycobacterium* genus and four recently reclassified genera (*Mycolicibacterium*,  
32 *Mycobacteroides*, *Mycolicibacter*, and *Mycolicibacillus*) (Gupta et al., 2018),  
33 conjugation has already been associated with plasmids and chromosomal fragments  
34 (distributive conjugal transfer) (Gray and Derbyshire, 2018). The mycobacterial  
35 conjugation system is driven by the type VII secretion system (T7SS), which is  
36 encoded by six paralogous loci (ESX-1, -2, -3, -4, -5 and -4-bis), each one with  
37 different genetic organizations and functions (Dumas et al., 2016). Due to the impact  
38 that plasmid exchange has on many aspects of bacterial biology, this issue has been  
39 studied in depth in several bacterial taxa, but in *Mycobacteriaceae* little significance  
40 has been given to this point (Shoulah et al., 2018).

41 Plasmid conjugation in *Mycobacteriaceae* has only been experimentally observed in  
42 few species of three genera: *Mycobacterium* (*M. tuberculosis*, *M. marinum*, *M. avium*,  
43 *M. kansasii*, and *M. bovis*), *Mycobacteroides* (*M. abscessus*), and *Mycolicibacterium*  
44 (*M. smegmatis*). Moreover, conjugations in these genera only occurred between  
45 organisms of the same genus, species, or to *Escherichia coli* (Wang et al., 2003;  
46 Rabello et al., 2012; Leão et al., 2013; Ummels et al., 2014; Gray and Derbyshire,  
47 2018; Shoulah et al., 2018). Concerning *Mycolicibacterium* genus and plasmid  
48 conjugation, only one species, *M. smegmatis*, has been considered as a model in tests  
49 with recombinant plasmids (lacks natural plasmids), since it is a fast-growing and  
50 non-pathogenic species (Lazraq et al., 1990; Wang et al., 2003; Derbyshire and Gray,  
51 2014; Gray and Derbyshire, 2018). In this genus, plasmids were thought to be scarce  
52 (Gray and Derbyshire, 2018; Morgado and Vicente, 2021) and reports of conjugative  
53 transfer of naturally occurring plasmids are rare, only showing successful conjugation  
54 of a small (<10 kb size) non-conjugative plasmid from *E. coli* to *M. smegmatis*  
55 (Gormley and Davies, 1991).

56 Previous genomic analyzes on *Mycolicibacterium* sp. from Atlantic Forest soil  
57 revealed the presence of three plasmids (pCBMA213\_1, ~274 kb; pCBMA213\_2,  
58 ~160 kb; and pCBMA213\_3, ~21 kb) in a lineage. Curiously, strains from this lineage  
59 presented distinct plasmid profiles, varying from one (pCBMA213\_3) to the three  
60 plasmids. In addition, in another *Mycolicibacterium* sp. lineage, no plasmids were  
61 identified (Morgado and Vicente, 2020). So, to contribute with experimental evidence  
62 of conjugation in this bacterial family, analyzing the conjugative capability of these  
63 natural plasmids, we performed conjugation tests using these wild *Mycolicibacterium*  
64 strains carrying plasmids as donors and a wild *Mycolicibacterium* as the recipient. In  
65 this way, we revealed evidence of conjugative transfer of naturally occurring plasmids  
66 in the *Mycolicibacterium* genus.

67

## 68 **Materials and Methods**

### 69 **Bacterial strains**

70 Four *Mycolicibacterium* sp. strains (*Mycolicibacterium* sp. CBMA213,  
71 *Mycolicibacterium* sp. CBMA234, *Mycolicibacterium* sp. CBMA311, and  
72 *Mycolicibacterium* sp. CBMA360) isolated from Atlantic Forest soil (deposited in  
73 CBAS, Bacterial Collection, Fiocruz/Brazil) were used in this study. They were  
74 cultivated in 5 ml of Tryptic Soy Broth (TSB) supplemented with Tween80 (0.05%)  
75 for 10 days at 22°C before the mating experiments.

### 76 **Pulsed-field gel electrophoresis**

77 Genomic DNA of the *Mycolicibacterium* strains was submitted to PFGE. After  
78 bacterial growth, cells were suspended in PIV buffer (10 mM Tris-HCl pH 7.6, 1 M  
79 NaCl). Agarose plugs were prepared by mixing the suspension in PFGE molds, and  
80 after solidification, the plugs were transferred to lysis buffer (6 mM Tris-HCl pH 7.6,  
81 1 M NaCl, 100 mM EDTA, 0.2% deoxycholate, 0.5% N-lauroylsarcosine, 0.5%  
82 Brij-58, 10 mg/ml lysozyme) and incubated overnight at 37°C. Lysis buffer was

83 removed and the plugs were incubated overnight at 50°C in ESP buffer (0.5 M EDTA  
84 pH 8, 1% N-lauroylsarcosine, 100 µg/ml proteinase K). Next, the plugs were washed  
85 four times/day for a week with TE buffer (10 mM Tris-HCl pH 8, 0.1 mM EDTA)  
86 until used. The plugs were loaded on a 1.2% agarose gel in a Bio-Rad CHEF-DR III  
87 system containing TBE buffer (44.5 mM Tris-HCl, 44.5 mM boric acid, 1 mM EDTA,  
88 pH 8.3), and were subjected to a pulse of 5 s ramping to 35 s for 18 h at 5.5 V/cm.  
89 Two runs were carried out: one with non-digested DNA, and the other with digested  
90 DNA by DraI restriction enzyme (Promega) at 37°C overnight. In the gels, the  
91 Lambda ladder PFG marker (New England BioLabs) was used as molecular standard.

## 92 **Mating experiments**

93 Mating experiments were performed in triplicates using *M. sp.* CBMA213, *M. sp.*  
94 CBMA311, and *M. sp.* CBMA360 as donors, and *M. sp.* CBMA234 as the recipient.  
95 The recipient strain was negative for the presence of plasmids, as observed by PCR of  
96 plasmid genes and non-digested PFGE. Aliquots of 2 ml of each recipient and donor  
97 strains were combined (three mating pairs in total) and filtered through sterile 0.22  
98 µm membranes (Merck Millipore, GSWP02500), which were incubated over TSA  
99 plates for 8 days at 22°C. After this period, the membranes were transferred to sterile  
100 containers and washed with 5 ml of TSB supplemented with 5 µg/ml of rifampicin  
101 (Sigma-Aldrich). Next, serial dilutions were plated on TSA supplemented with 5  
102 µg/ml of rifampicin. Rifampicin was used as a selection marker because the donor  
103 cells were susceptible on 5 µg/ml concentration, while the recipient, not. The putative  
104 transconjugants were pooled from the TSA plates and submitted to further analysis.  
105 Those pools that did not generate amplicons related to the gene markers of the donor  
106 strains and presented a PFGE-DraI profile equal to the recipient strain were assumed  
107 to be transconjugants. The presence of the plasmids in transconjugants was verified  
108 by non-digested PFGE and amplification of plasmid gene markers.

## 109 **PCR assays**

110 PCR assays were performed using different PCR kits, depending on the set of primers  
111 used (Table 1), in 50 µl reactions in the following conditions: (i) 95°C for 5 min, 40  
112 cycles of 95°C for 30 s, 55°C for 30 s and 72°C for 45 s, with a final elongation step  
113 at 72° for 10 min (Promega, GoTaq DNA Polymerase); (ii) 98°C for 5 min, 40 cycles  
114 of 96°C for 1 min, 50°C for 30 s and 72°C for 40 s, with a final elongation step at 72°  
115 for 10 min (Qiagen, Taq DNA Polymerase). The amplicons were purified using GFX  
116 PCR DNA and Gel Band Purification Kit (Sigma-Aldrich), according to the  
117 manufacturer, and the products were sequenced by 3730XL DNA Analyser (Applied  
118 Biosystems).

119

120 Table 1. Primer sequences

| Primers    | Sequences (5' -> 3')                                              | Gene target  | Amplicon size (bp) | PCR kit |
|------------|-------------------------------------------------------------------|--------------|--------------------|---------|
| cbma234U   | agc atc gct gag ttc aag g (F)<br>tta gct gtt tga ccc tgc tg (R)   | <i>arr</i>   | 630                | Promega |
| cbma213U   | gac cgg acc tga atg ttc tt (F)<br>gtg cgt tat caa tcg tcc tc (R)  | hypothetical | 606                | Promega |
| pCBMA213_1 | gcg atg agg aac ggt act aaa (F)<br>cgc tcc ata gtt gtc atg ct (R) | <i>vap</i>   | 526                | Promega |

|            |                                                                  |              |     |         |
|------------|------------------------------------------------------------------|--------------|-----|---------|
| pCBMA213_2 | atc tcc cgt aag acg ctg at (F)<br>ccg ggg gta gtt gtt tta tc (R) | <i>rep</i>   | 338 | Qiagen  |
| pCBMA213_3 | gca atg tgg tga tcc tga gt (F)<br>aca aga agg gca tga gca (R)    | hypothetical | 332 | Promega |

121

## 122 Results

123 The experiments were performed using three donor strains, which presented different  
124 plasmid profiles, as observed in previous *in silico* analyzes (Morgado and Vicente,  
125 2020): *Mycolicibacterium* sp. CBMA213; bearing pCBMA213\_1, pCBMA213\_2,  
126 and pCBMA213\_3; *Mycolicibacterium* sp. CBMA311, bearing pCBMA213\_3; and  
127 *Mycolicibacterium* sp. CBMA360, bearing pCBMA213\_2 and pCBMA213\_3. The  
128 recipient strain was *Mycolicibacterium* sp. CBMA234, which is devoid of plasmids.  
129 To validate these *in silico* plasmid predictions, the plasmid profiles of the strains were  
130 revealed by pulsed-field gel electrophoresis of non-digested DNA, which showed the  
131 presence of different band profiles (plasmids) in the donor strains, and the absence of  
132 bands in the recipient strain (Figure 1).

133

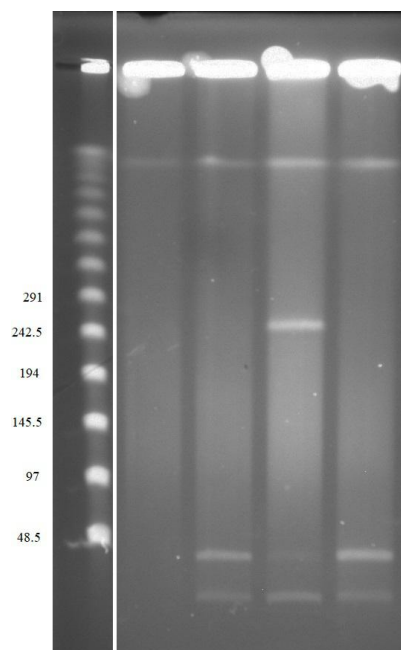

134

135 Figure 1. PFGE with undigested DNA from *M. sp.* CBMA234, *M. sp.* CBMA311, *M. sp.* CBMA213,  
136 *M. sp.* CBMA360. In the left column the size (kb) of the bands is shown.

137

138 In addition to PFGE, we also showed the presence of the distinct plasmids in the  
139 donor strains by PCR targeting marker genes of each plasmid (Table 2). These marker  
140 genes were assigned to these plasmids based on the *in-silico* analyses (Morgado and  
141 Vicente, 2020). The plasmid pCBMA213\_2 (~160 kb size) was not observed in the  
142 PFGE, however, the presence of this plasmid, and the others, in the donor strains was  
143 previously characterized by whole genome sequencing (Morgado and Vicente, 2020),  
144 and here by PCR (Table 2).

145

146 Table 2. PCR results for the marker genes of each strain

| Strains               | pCBMA213_1 | pCBMA213_2 | pCBMA213_3 | Donor marker | Recipient marker |
|-----------------------|------------|------------|------------|--------------|------------------|
| <i>M. sp.</i> CBMA213 | +          | +          | +          | +            | -                |
| <i>M. sp.</i> CBMA234 | -          | -          | -          | -            | +                |
| <i>M. sp.</i> CBMA311 | -          | -          | +          | +            | -                |
| <i>M. sp.</i> CBMA360 | -          | +          | +          | +            | -                |
| Tc04                  | -          | -          | +          | -            | +                |
| Tc14                  | -          | -          | +          | -            | +                |
| Tc24                  | +          | -          | +          | -            | +                |

147 +, positive; -, negative.

148

149 The mating experiments were performed on a solid medium using *M. sp.* CBMA311,  
150 *M. sp.* CBMA360, or *M. sp.* CBMA213 as donors, and *M. sp.* CBMA234 as the same  
151 recipient. The putative transconjugants were selected in a solid medium supplemented  
152 with 5 µg/ml of rifampicin. The plasmids pCBMA213\_1, pCBMA213\_2, and  
153 pCBMA213\_3 lack a suitable marker for the selection of eventual transconjugants.  
154 However, the recipient and donor strains could be selected by their rifampicin  
155 susceptibility, since the recipient strain is resistant to  $\geq 5$  µg/ml of rifampicin, while  
156 the donors do not grow at this concentration (data not shown). To check the success of  
157 the conjugation, the transconjugant pools (Tc04, Tc14, and Tc24: transconjugants of  
158 the recipient *M. sp.* CBMA234 with the donors *M. sp.* CBMA360, *M. sp.* CBMA311,  
159 or *M. sp.* CBMA213, respectively) were submitted to PFGE of non-digested DNA  
160 and PCR. As PFGE result, no bands corresponding to the plasmids were revealed.  
161 Conversely, a PCR assay, based on the plasmid marker genes, resulted in amplicons  
162 of pCBMA213\_3 plasmid (~21 kb) in Tc04, Tc14, and Tc24 pools; and  
163 pCBMA213\_1 plasmid (~274 kb) in Tc24 pool (Table 2). These amplicons were  
164 further Sanger sequenced and confirmed as the target genes. In addition, to verify the  
165 absence of the donor strain in the transconjugant pools, a PFGE with DraI restriction  
166 enzyme digestion was performed. The wild donors and the recipient, as well as  
167 transconjugants, had their PFGE pattern defined, and it was possible to observe that  
168 the transconjugants share the same pattern with the recipient strain (Figure 2).  
169 Furthermore, the transconjugant pools were submitted to PCR targeting marker genes  
170 of the donor and recipient strains, revealing the presence of only the recipient strain  
171 (Table 2). Altogether, these results showed that pCBMA213\_1 and pCBMA213\_3  
172 were transferred by a conjugation-like mechanism between *Mycolicibacterium* strains.

173

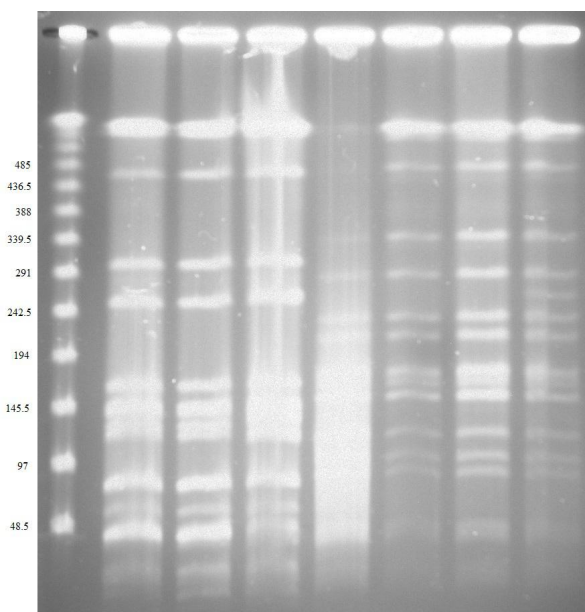

174

175 Figure 2. PFGE with *DraI* digested DNA from *M. sp.* CBMA360, *M. sp.* CBMA311, *M. sp.* CBMA213,  
176 *M. sp.* CBMA234, Tc04, Tc14, and Tc24. In the left column the size (kb) of the bands is shown.

177

## 178 Discussion

179 To date, the experimental studies of HGT in *the Mycobacteriaceae* family involved  
180 only organisms of few species. Among them, *Mycolicibacterium smegmatis* is the  
181 model organism used in several conjugative experiments involving transfer of  
182 recombinant (successful) and natural (unsuccessful) plasmids to/from other genera of  
183 *Mycobacteriaceae* (Lazraq et al., 1990; Gormley and Davies, 1991; Wang et al., 2003;  
184 Rabello et al., 2012; Leão et al., 2013; Ummels et al., 2014; Derbyshire and Gray,  
185 2014). Here, we present experimental evidence of conjugation of naturally occurring  
186 plasmids between wild *Mycolicibacterium sp.* strains, both as a recipient and as a  
187 donor. Among the three plasmids tested, two of them (pCBMA213\_1 and  
188 pCBMA213\_3) could be observed in the transconjugant strains, showing that  
189 *Mycolicibacterium* can transfer plasmids with a wide variation in size (21 - 274 kb) in  
190 a conjugation-like mechanism. In fact, the transfer efficiency appears to have been  
191 low, as the transconjugants were only detected through molecular assays. In previous  
192 studies, in which donors and recipients were *Mycobacterium* strains, it was  
193 demonstrated conjugation-like mechanisms with low and high transfer efficiency  
194 (Rabello et al., 2012; Ummels et al., 2014; Shoulah et al., 2018). However,  
195 conjugation experiments between *Mycolicibacterium* and other *Mycobacteriaceae*  
196 genera (*Mycobacterium* or *Mycobacteroides*) were not successful (Rabello et al., 2012;  
197 Leão et al., 2013; Ummels et al., 2014), suggesting the existence of some species  
198 barrier (Neil et al., 2021).

199 In a previous genomic analysis of the two successfully transferred plasmids (Morgado  
200 and Vicente, 2020), no classical conjugative gene was identified, such as *virB4*, *virD4*,  
201 and relaxases (Smillie et al., 2010). Moreover, sequences associated with known  
202 plasmid origin of transfer (*oriT*) were not identified (Morgado and Vicente, 2020),  
203 which would define them as non-mobilizable plasmids (Smillie et al., 2010). In *the*

204 *Mycobacterium* genus, a conjugative plasmid was shown to require both type IV and  
205 type VII secretion systems (ESX-2) (Ummels et al., 2014). Curiously, pCBMA213\_1  
206 harbors a distinct T7SS (ESX-3), but it lacks type IV secretion system genes  
207 (Morgado and Vicente, 2020). Although pCBMA213\_1 and pCBMA213\_3 plasmids  
208 were characterized as non-mobilizable plasmids, they were transferred, so it is likely  
209 that they were transferred *in trans* by other elements through unknown oriT sites or  
210 that they have an as-yet-undescribed conjugation mechanism. Thus, pCBMA213\_2  
211 could act as a helper plasmid, mobilizing other plasmids (Guédon et al., 2017), since  
212 this plasmid carries the set of genes associated with conjugation (Morgado and  
213 Vicente, 2020). Indeed, the *E. coli* plasmids transferred to *M. smegmatis* were  
214 supported by helper plasmids (Lazraq et al., 1990; Gormley and Davies, 1991).  
215 Another alternative could involve the distributive conjugal transfer mechanism, which  
216 involves the ESX-1 and ESX-4 secretion systems, and it has been associated with  
217 mycobacterial conjugation of unlinked chromosomal fragments (Wang et al., 2003;  
218 Gray and Derbyshire, 2018). Interestingly, here, the chromosome of the donor strains  
219 carried ESX-4, while the chromosome of the recipient strain had both ESX-1 and  
220 ESX-4.

221 In conclusion, these findings provide new evidence for conjugative transfer of  
222 naturally occurring plasmids in the *Mycobacterium* genus, as other transfer  
223 mechanisms, such as transformation, seem unlikely to have occurred due to the sizes  
224 of transferred plasmids. These evidence are clues that can be further explored in this  
225 diverse and important family of bacteria.

226

## 227 **Acknowledgments**

228 This work was supported by the Coordination for the Improvement of Higher  
229 Education Personnel (Coordenação de Aperfeiçoamento de Pessoal de Nível  
230 Superior—CAPES)—Finance Code 001; and Inova Fiocruz/Fundação Oswaldo Cruz.

231

## 232 **References**

233 Wang J, Parsons LM, Derbyshire KM. Unconventional conjugal DNA transfer in  
234 mycobacteria. *Nat Genet* 2003, doi:10.1038/ng1139.

235 Kohler V, Keller W, Grohmann E. Regulation of Gram-Positive Conjugation. *Front*  
236 *Microbiol* 2019, doi:10.3389/fmicb.2019.01134.

237 Gupta RS, Lo B, Son J. Phylogenomics and Comparative Genomic Studies Robustly  
238 Support Division of the Genus *Mycobacterium* into an Emended Genus  
239 *Mycobacterium* and Four Novel Genera. *Front Microbiol* 2018,  
240 doi:10.3389/fmicb.2018.00067.

241 Gray TA, Derbyshire KM. Blending genomes: distributive conjugal transfer in  
242 mycobacteria, a sexier form of HGT. *Mol Microbiol* 2018, doi:10.1111/mmi.13971.

- 243 Dumas E, Christina Boritsch E, Vandebogaert M et al. Mycobacterial Pan-Genome  
244 Analysis Suggests Important Role of Plasmids in the Radiation of Type VII Secretion  
245 Systems. *Genome Biol Evol* 2016, doi:10.1093/gbe/evw001.
- 246 Shoulah SA, Oschmann AM, Selim A et al. Environmental *Mycobacterium avium*  
247 subsp. *hominissuis* have a higher probability to act as a recipient in conjugation than  
248 clinical strains. *Plasmid* 2018, doi:10.1016/j.plasmid.2018.01.003.
- 249 Rabello MC, Matsumoto CK, Almeida LG et al. First description of natural and  
250 experimental conjugation between *Mycobacteria* mediated by a linear plasmid. *PLoS*  
251 *One* 2012, doi:10.1371/journal.pone.0029884.
- 252 Leão SC, Matsumoto CK, Carneiro A et al. The detection and sequencing of a  
253 broad-host-range conjugative IncP-1 $\beta$  plasmid in an epidemic strain of  
254 *Mycobacterium abscessus* subsp. *Bolletii*. *PLoS One* 2013,  
255 doi:10.1371/journal.pone.0060746.
- 256 Ummels R, Abdallah AM, Kuiper V et al. Identification of a novel conjugative  
257 plasmid in mycobacteria that requires both type IV and type VII secretion. *mBio* 2014,  
258 doi:10.1128/mBio.01744-14.
- 259 Lazraq R, Clavel-Sérès S, David HL et al. Conjugative transfer of a shuttle plasmid  
260 from *Escherichia coli* to *Mycobacterium smegmatis*. *FEMS Microbiol Lett* 1990,  
261 doi:10.1016/0378-1097(90)90427-r.
- 262 Derbyshire KM, Gray TA. Distributive Conjugal Transfer: New Insights into  
263 Horizontal Gene Transfer and Genetic Exchange in *Mycobacteria*. *Microbiol Spectr*  
264 2014, doi:10.1128/microbiolspec.MGM2-0022-2013.
- 265 Morgado SM, Vicente ACP. Comprehensive in silico survey of the  
266 *Mycobacterium* mobilome reveals an as yet underexplored diversity. *Microb*  
267 *Genom* 2021, doi:10.1099/mgen.0.000533.
- 268 Gormley EP, Davies J. Transfer of plasmid RSF1010 by conjugation from  
269 *Escherichia coli* to *Streptomyces lividans* and *Mycobacterium smegmatis*. *J Bacteriol*  
270 1991, doi:10.1128/jb.173.21.6705-6708.1991.
- 271 Morgado SM, Paulo Vicente AC. Genomics of Atlantic Forest *Mycobacteriaceae*  
272 strains unravels a mobilome diversity with a novel integrative conjugative element  
273 and plasmids harbouring T7SS. *Microb Genom* 2020, doi:10.1099/mgen.0.000382.
- 274 Neil K, Allard N, Rodrigue S. Molecular Mechanisms Influencing Bacterial  
275 Conjugation in the Intestinal Microbiota. *Front Microbiol* 2021,  
276 doi:10.3389/fmicb.2021.673260.
- 277 Smillie C, Garcillán-Barcia MP, Francia MV et al. Mobility of plasmids. *Microbiol*  
278 *Mol Biol* 2010, doi:10.1128/MMBR.00020-10.
- 279 Guédon G, Libante V, Coluzzi C et al. The Obscure World of Integrative and  
280 Mobilizable Elements, Highly Widespread Elements that Pirate Bacterial Conjugative  
281 Systems. *Genes (Basel)* 2017, doi:10.3390/genes8110337.
